# Supplementary material for: Tyrosylprotein sulfotransferase-dependent and -independent regulation of root development and signaling by PSK LRR receptor kinases in Arabidopsis
Source: PubMed Central journal article supplement (PMC8318253; doi:10.1093/jxb/erab233), 2021-05-24
Supplement: erab233_suppl_supplementary_file002.pdf [file erab233_suppl_supplementary_file002.pdf]

# Supplementary Figure S1

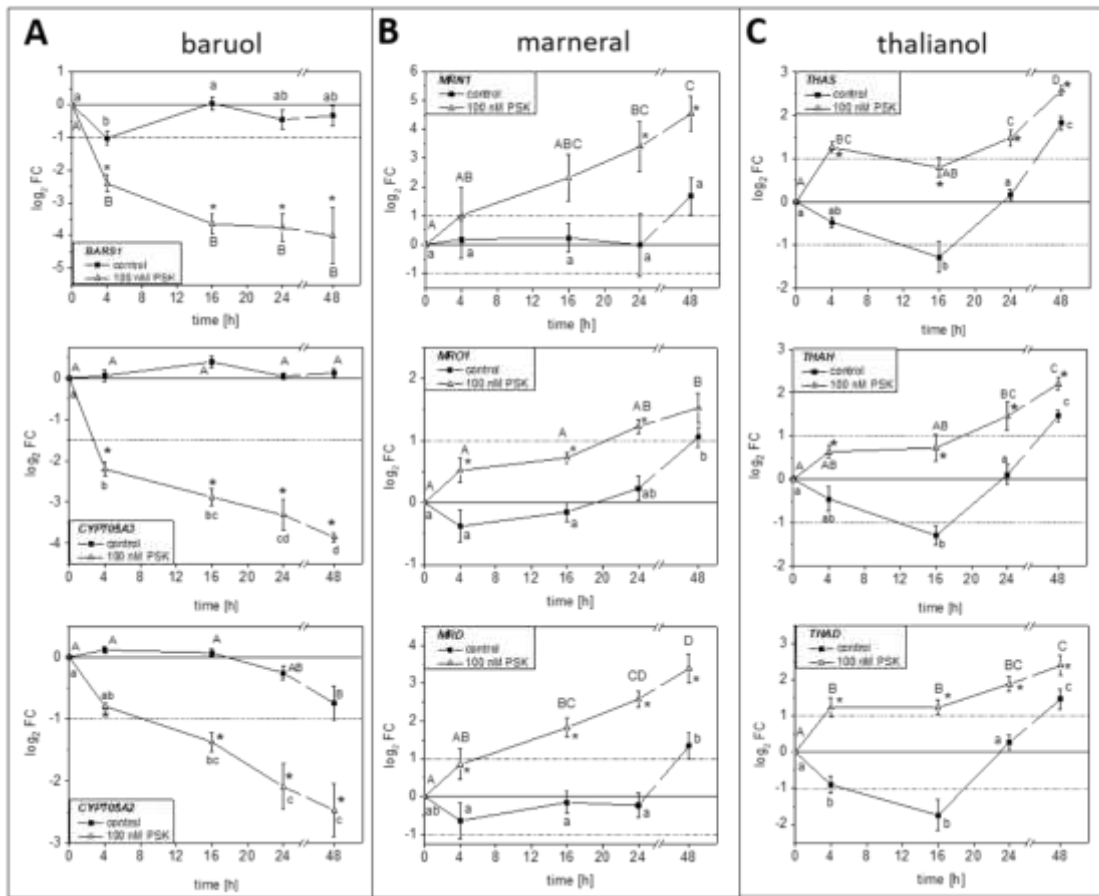

**Supplementary Figure S1: Expression analysis of genes involved in triterpene synthesis in response to PSK treatment.** log<sub>2</sub> fold change of expression of **(A)** baruol, **(B)** marneral and **(C)** thalianol biosynthesis genes. Expression was tested in roots of *tpst-1* seedlings that were grown for five days in hydroponic culture and treated with or without 100 nM PSK for the time indicated. Small or capital letters indicate significant differences between time points of control samples or PSK-treated samples (ANOVA, post-hoc Bonferroni, p<0.05), whereas asterisks indicate significant difference between treatments at a specific time point (Student t-test; p<0.05; n=3 three).

# Supplementary Figure S2

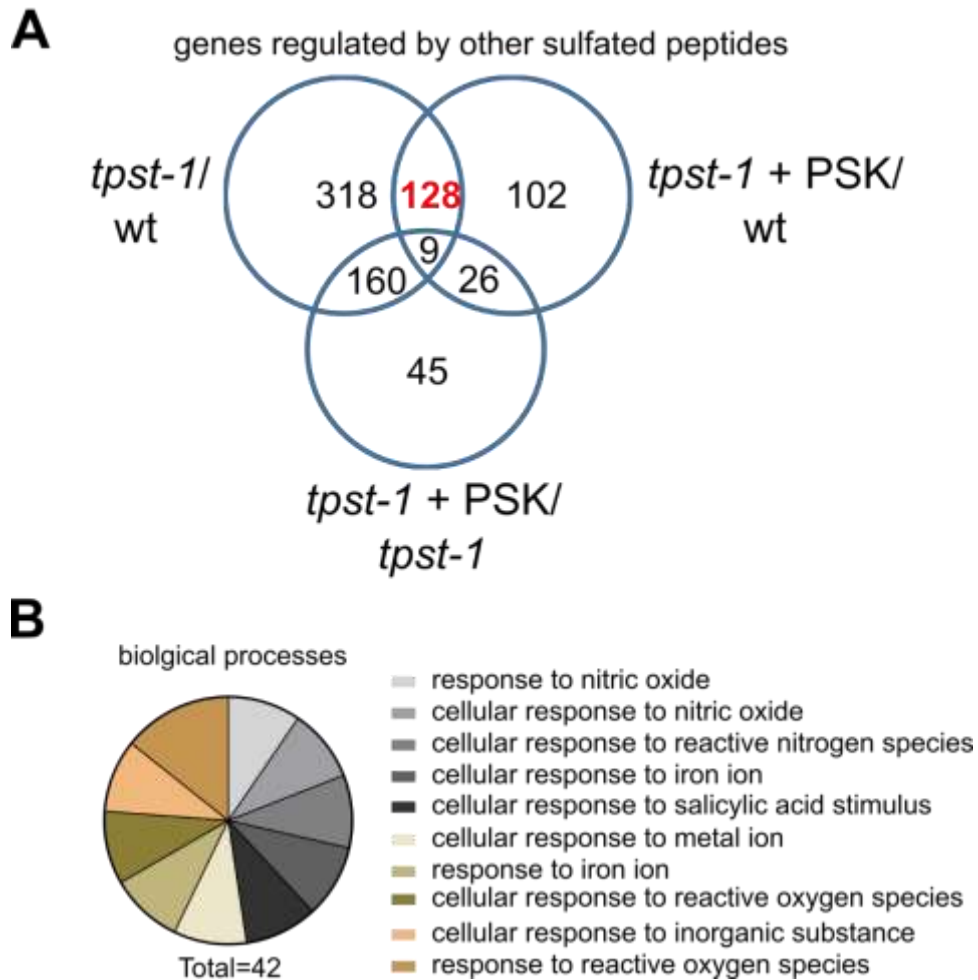

## Supplementary Figure S2: Genes regulated by other sulfated peptides than PSK.

**(A)** Venn diagram of genes regulated between the different genotypes and treatments indicated. Total number of genes regulated are given. The red number indicates the number of genes regulated by other sulfated peptides than PSK **(B)** Biological processes that are overrepresented among the genes that are regulated by other sulfated peptides than PSK. The identified genes were analyzed by the PANTHER16.0 programme (Mi *et al.*, 2019; Mi *et al.*, 2021). A total of 42 genes could be assigned to biological processes that are overrepresented.

# Supplementary Figure S3

**A**

biological processes

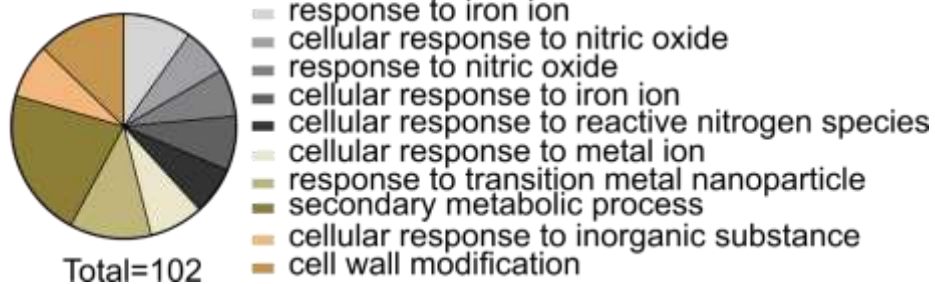

**Supplementary Figure S3: Regulated genes overrepresented in the *tpst-1* mutant.** Biological processes that are overrepresented among the genes that are regulated in the *tpst-1* versus wild type. The identified genes were analyzed by the PANTHER16.0 programme (Mi *et al.*, 2019; Mi *et al.*, 2021). A total of 102 genes could be assigned to biological processes that are overrepresented.

## Supplementary Figure S4

| Gene                                                                         | Comparison | Comparison         |                          |                                     | Category |
|------------------------------------------------------------------------------|------------|--------------------|--------------------------|-------------------------------------|----------|
|                                                                              |            | <i>tpst-1</i> / wt | <i>tpst-1</i> + PSK / wt | <i>tpst-1</i> + PSK / <i>tpst-1</i> |          |
| AT1G77640; member of the DREB subfamily A-5 of ERF/AP2 transcription factors |            | 3.27               | 1.83                     | 0.56                                | A        |
| AT1G49960; Xanthine/uracil permease family protein                           |            | 0.33               | 0.64                     | 1.90                                | A        |
| At3g22120; CWLP, Cell Wall-plasma Membrane Linker Protein                    |            | 8.81               | 3.09                     | 0.35                                | B        |
| At5g35940; Mannose-binding lectin superfamily protein                        |            | 0.06               | 0.29                     | 5.24                                | B        |
| At3g06019; unknown function                                                  |            | 1.73               | 2.73                     | 1.58                                | C        |
| At3g21260; GLTP3, Glycolipid Transfer Protein 3                              |            | 0.53               | 0.27                     | 0.52                                | C        |

**Supplementary Figure S4: Genes that could not be clearly categorized as regulated by PSK or other sulfated peptides and were sorted by different categories.** Genes are derived from the microarray experiment. Microarray experiments were performed with three biological replicates.

## Supplementary Figure S5

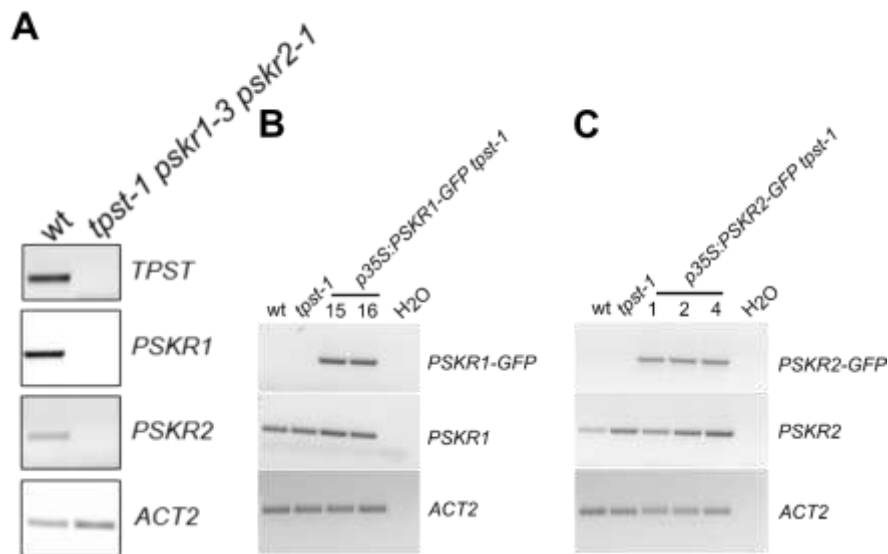

**Supplementary Figure S5: Semi-quantitative RT-PCR analysis of (A) *wt* and *tpst-1 pskr1-3 pskr2-1*, (B) *wt*, *tpst-1* and two independent *p35S:PSKR1-GFP tpst-1* lines and (C) *wt*, *tpst-1* and three independent *p35S:PSKR2-GFP tpst-1* lines. Transcript levels of *TPST*, *PSKR1*, *PSKR1-GFP* and/ or *PSKR2* and *PSKR2-GFP* were analyzed in 5-day-old seedlings by RT-PCR. *Actin2* was amplified as a control for RNA input.**

## Supplementary Figure S6

| Gene                                                                     | Comparison |                    |                          |                                     |
|--------------------------------------------------------------------------|------------|--------------------|--------------------------|-------------------------------------|
|                                                                          |            | <i>tpst-1</i> / wt | <i>tpst-1</i> + PSK / wt | <i>tpst-1</i> + PSK / <i>tpst-1</i> |
| <i>At3g59900</i> ; ARGOS, Auxin-regulated gene involved in organ size    |            | 4.63               | 1.66                     | 0.36                                |
| <i>At5g06080</i> ; LBD33, Lob Domain-containing Protein 33               |            | 3.05               | 2.49                     | 0.81                                |
| <i>At1g76420</i> ; ANAC031, Arabidopsis Nac Domain Containing Protein 31 |            | 2.77               | 1.28                     | 0.46                                |
| <i>At5g12330</i> ; LRP1, Lateral Root Primordium 1                       |            | 2.36               | 1.72                     | 0.73                                |
| <i>At3g27940</i> ; LBD26, Lob Domain-containing Protein 26               |            | 0.24               | 0.20                     | 0.83                                |

**Supplementary Figure S6: Differentially regulated genes with functions in lateral root growth and development.** Genes are derived from the microarray experiment. Microarray experiments were performed with three biological replicates.

## Supplementary Figure S7

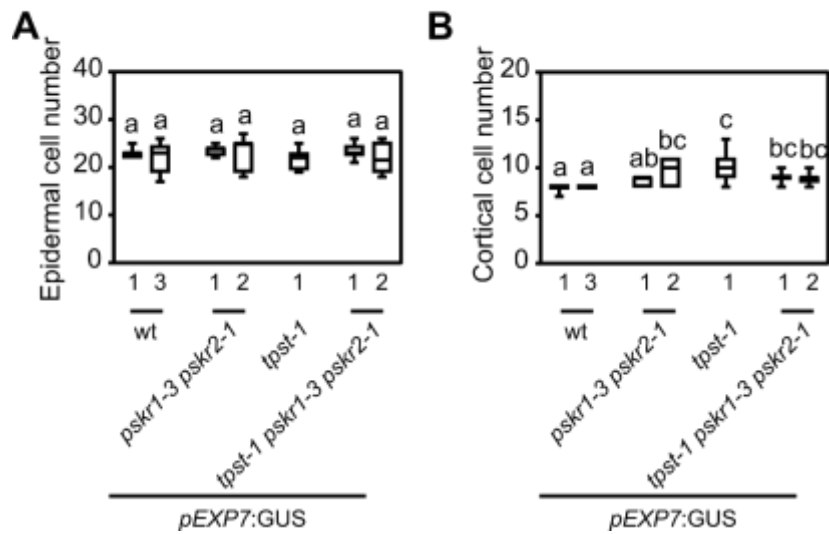

### Supplementary Figure S7: Analysis of epidermal and cortical cell numbers (A, B)

Quantification of (A) epidermal cell numbers and (B) cortical cell numbers in wild type, *pskr1-3 pskr2-1*, *tpst-1* and *tpst-1 pskr1-3 pskr2-1* that were determined from cross sections of *pEXP7:GUS*-expressing lines. Numbers indicate independent transgenic lines. Experiments were performed at least three times with similar results. Data are shown for one representative experiment as the mean  $\pm$  SE, (A)  $n \geq 9$ , (B)  $n \geq 9$ . Different letters indicate significant differences (Kruskal-Wallis,  $P < 0.05$ ).

## Supplementary Table S1

**Table S1: Primers used for analysis by PCR.** For each gene, the upper sequence represents the forward primer, the bottom sequence the reverse primer.

| locus     | name         | primer sequence (5' to 3')         | analysis |
|-----------|--------------|------------------------------------|----------|
| At3g04120 | <i>GAPC1</i> | GATTCTACAATGGCTGACAAGAAGA          | qPCR     |
|           |              | ATGAAGGGGTCGTTGACAGC               | qPCR     |
| At3g18780 | <i>ACT2</i>  | ACATTCCAGCAGATGTGGATCTC            | qPCR     |
|           |              | GATCCCATTTCATAAAACCCCAGC           | qPCR     |
| At5g14750 | <i>WER</i>   | TCGTATTGCCAAAAAGACTGGTTTA          | qPCR     |
|           |              | TGATAAGATCCTCTTCTTGCTCGG           | qPCR     |
| At5g40330 | <i>MYB23</i> | CTCCTCGGCAACAGATGGTC               | qPCR     |
|           |              | GGCTTTGACGGCAGTTGAAT               | qPCR     |
| At1g11130 | <i>SCM</i>   | AATCGGGGAAGGGTCGATTG               | qPCR     |
|           |              | TTGAGGAATTCGCCGTCCT                | qPCR     |
| At1g66800 |              | GCGATGAAGGCATGGTATGG               | qPCR     |
|           |              | GCAAACTGGTCCGATCACG                | qPCR     |
| At5g03150 | <i>JKD</i>   | ATGCGCAAGGTCTATCCGAG               | qPCR     |
|           |              | AGGGTTTGTGGAAGTCATTGGA             | qPCR     |
| At1g12560 | <i>EXP7</i>  | TGCATACCGAAGAGTGCCAT               | qPCR     |
|           |              | AACGGCCATGCTCTTGATGT               | qPCR     |
| At3g18780 | <i>ACT2</i>  | CAAAGACCAGCTCTTCCATCG              | RT-PCR   |
|           |              | AGGTCCAGGAATCGTTCACAG              | RT-PCR   |
| At1g08030 | <i>TPST</i>  | GGCTCTTTTGCGGAACCTGA               | RT-PCR   |
|           |              | CTTCAATTTTCGTGCATCTCG              | RT-PCR   |
| At2g02220 | <i>PSKR1</i> | GTTTCGGAGTTGTGCTTCTCGAG            | RT-PCR   |
|           |              | CCAAGAGACTAACTGTTGAGTCGTTG         | RT-PCR   |
| At5g53890 | <i>PSKR2</i> | GAGGAGACTATCAGCGGGG                | RT-PCR   |
|           |              | GGCCTAAGCAACCTCGCTAA               | RT-PCR   |
| GFP       | <i>GFP</i>   | forward primer from PSKR1 or PSKR2 | RT-PCR   |
|           |              | CAGATGAACTTCAGGGTCAG               | RT-PCR   |



|           |                 |                         |      |
|-----------|-----------------|-------------------------|------|
| At1g79840 | <i>GL2</i>      | CATGGACGTGGGACAATGGA    | qPCR |
|           |                 | CATCAGCTGAATAGCCCCGT    | qPCR |
| At1g12560 | <i>EXP7</i>     | TGCATACCGAAGAGTGCCAT    | qPCR |
|           |                 | AACGGCCATGCTCTTGATGT    | qPCR |
| At5g42600 | <i>MRN1</i>     | TGCATACACTTCCACCGCAT    | qPCR |
|           |                 | GCTCCCAAACCTGGCATACT    | qPCR |
| At5g42590 | <i>MRO1</i>     | CGGGCACACAGGTGATCATT    | qPCR |
|           |                 | CGTCCAACAAAATCCCAAGTTGA | qPCR |
| At5g42580 | <i>MRD</i>      | TCGCTTTGTCCCAGTCAACA    | qPCR |
|           |                 | GTGCATGTGGTCCGAGTAGT    | qPCR |
| At4g15370 | <i>BARS1</i>    | CTCGACCATGGTGGTGCTAC    | qPCR |
|           |                 | GAAGGAACCAGAACTCAGGGG   | qPCR |
| At4g15360 | <i>CYP705a3</i> | GGTGCAGTGCTTTGACTGGA    | qPCR |
|           |                 | GGTTGGGTTCGAAGAACGGA    | qPCR |
| At4g15350 | <i>CYP705a2</i> | TGAATGAGGCTGCTGGAACA    | qPCR |
|           |                 | AAGCAAGCTGACATCCCCAA    | qPCR |
| At5g48010 | <i>THAS</i>     | GGTTAGAGTGGCTTAGTCCAGTG | qPCR |
|           |                 | CCCTGGAAACTGTTTGTAACTGA | qPCR |
| At5g48000 | <i>THAH</i>     | GTTACACAATTCCAGCGGGC    | qPCR |
|           |                 | GCAACTCTTTCCCCTCCCAT    | qPCR |
| At5g47990 | <i>THAD1</i>    | GAATGTCTCCTCTCGCCCTC    | qPCR |
|           |                 | AGCAGCTTTTGGACCATGAAC   | qPCR |
